# Supplementary material for: A hybrid electromagnetic and leaf-shaped polytetrafluoroethylene triboelectric with an arc-shaped brace structure for energy harvesting
Source: Royal Society of Chemistry journal article supplement (doi:10.1039/c7ra08572a), 2017-01-01
Supplement: c7ra08572a1.pdf [file c7ra08572a1.pdf]

## Hybrid electromagnetic and leaf-shaped polytetrafluoroethylene triboelectric with arc-shaped braces structure for energy harvesting

Run Huang<sup>1</sup>, Jianxiong Zhu<sup>2,a</sup>

<sup>1</sup>School of Materials Science and Engineering, Anhui University of Science & Technology, Huainan, 232001, China

<sup>2</sup>Beijing Institute of Nanoenergy&Nanosystems, Chinese Academy of Sciences, National Center for Nanoscience and Technology (NCNST), Beijing 100083, China

<sup>a</sup>Corresponding Author: danverzhu@gmail.com

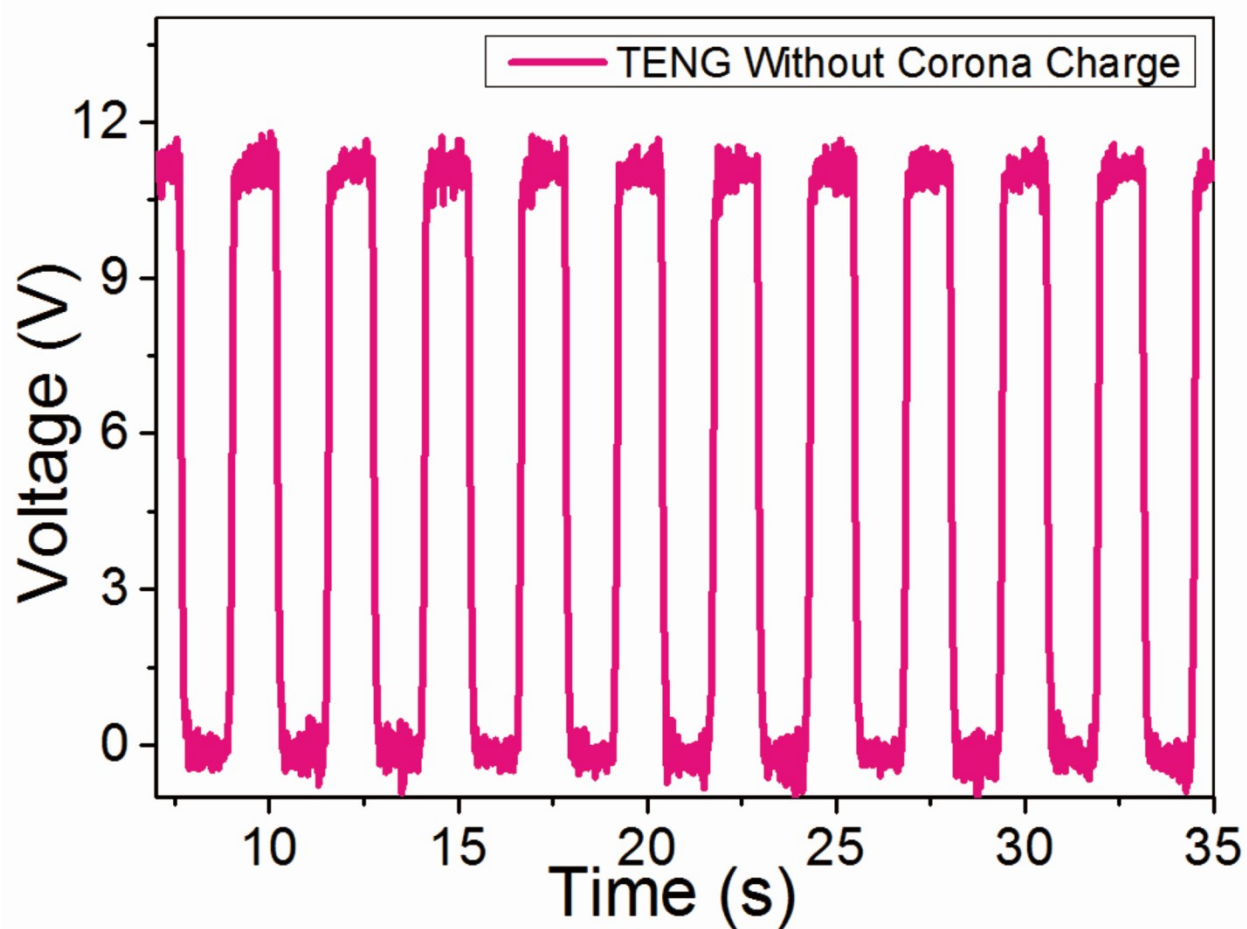

**Figure S1.** Measurement results of TENG in the hybrid structure,  $V_{oc}$  from the leaf-shaped PTFE electret film without corona charge.

**Table S1.** In comparison with our work and other group's work of the hybrid energy harvester.

| Items          | Mechanism                     | Output voltage                                                                                              |
|----------------|-------------------------------|-------------------------------------------------------------------------------------------------------------|
| Reference [18] | Triboelectric/Electromagnetic | 0.5 V, 6 coils with 113 cm <sup>2</sup> from magnetic;<br>200 V with 56 cm <sup>2</sup> from Triboelectric; |
| Reference [19] | Piezoelectric/triboelectric   | 320 mV from Piezoelectric;<br>20 V from Triboelectric;                                                      |
| Reference [20] | Photoelectric/triboelectric   | Triboelectric enhanced up to 0.6 V;                                                                         |
| Our work       | Triboelectric/Electromagnetic | 0.25 V at 1 cm <sup>2</sup> coil from magnetic;<br>24 V with 4 cm <sup>2</sup> from Triboelectric.          |
